# Supplementary material for: Theoretical Studies on the Mechanism of deNOx Process in Cu–Zn Bimetallic System—Comparison of FAU and MFI Zeolites
Source: MDPI journal article supplement (doi:10.3390/molecules27010300), 2022-01-04
Supplement: s1 [file s1]

# Theoretical studies on the mechanism of deNO<sub>x</sub> process in Cu-Zn bimetallic system - comparison of FAU and MFI zeolites

Izabela Kurzydym<sup>1</sup>, and Izabela Czekaj<sup>1,\*</sup>

<sup>1</sup> Faculty of Chemical Engineering and Technology, Cracow University of Technology, Warszawska 24, 31-155 Kraków, Poland; wiitch@pk.edu.pl

\* Correspondence: izabela.czekaj@pk.edu.pl

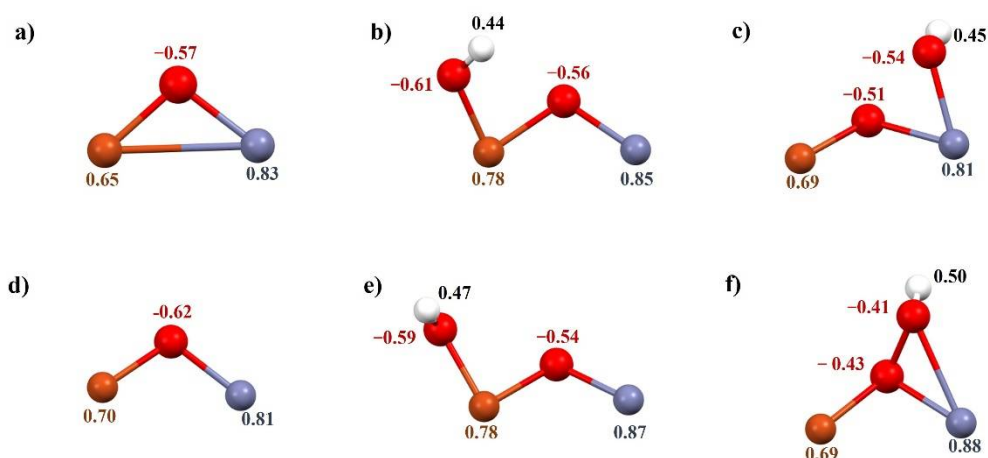

**Figure S1.** Charge distribution for metallic Cu-Zn dimers in FAU: a) Cu-Zn bimetallic dimer, b) Cu-Zn bimetallic dimer with OH group on Cu, c) Cu-Zn bimetallic dimer with OH group on Zn and in MFI d) Cu-Zn bimetallic dimer, e) Cu-Zn bimetallic dimer with OH group on Cu, f) Cu-Zn bimetallic dimer with OH group on Zn.

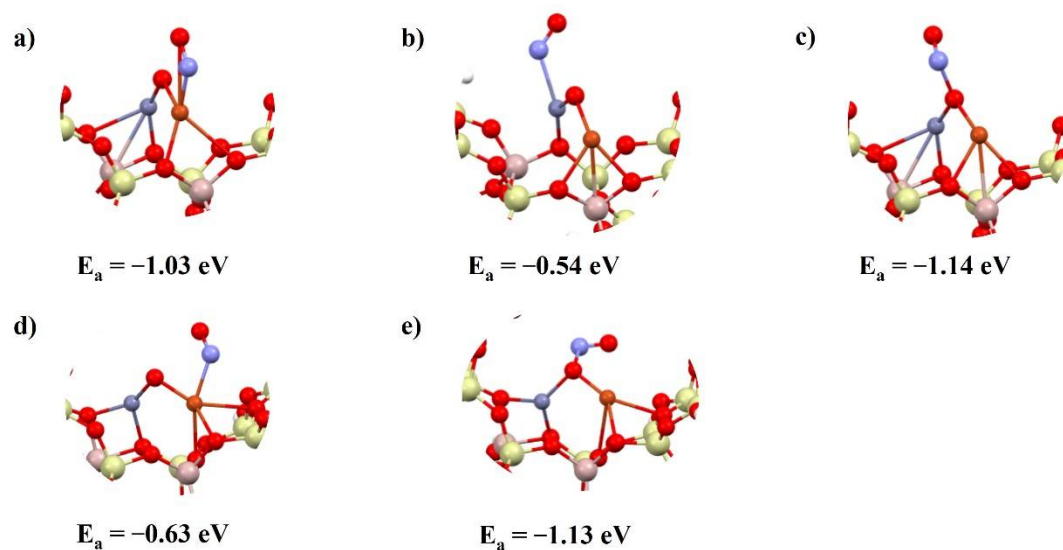

**Figure S2.** Adsorption of NO on Cu-O-Zn dimer in zeolite FAU: a) NO on Cu in dimer, b) NO on Zn in dimer, c) NO on oxygen bridge in dimer; and in zeolite MFI: d) NO on Cu in dimer e) NO on oxygen bridge in dimer. Energies of adsorption below structure.

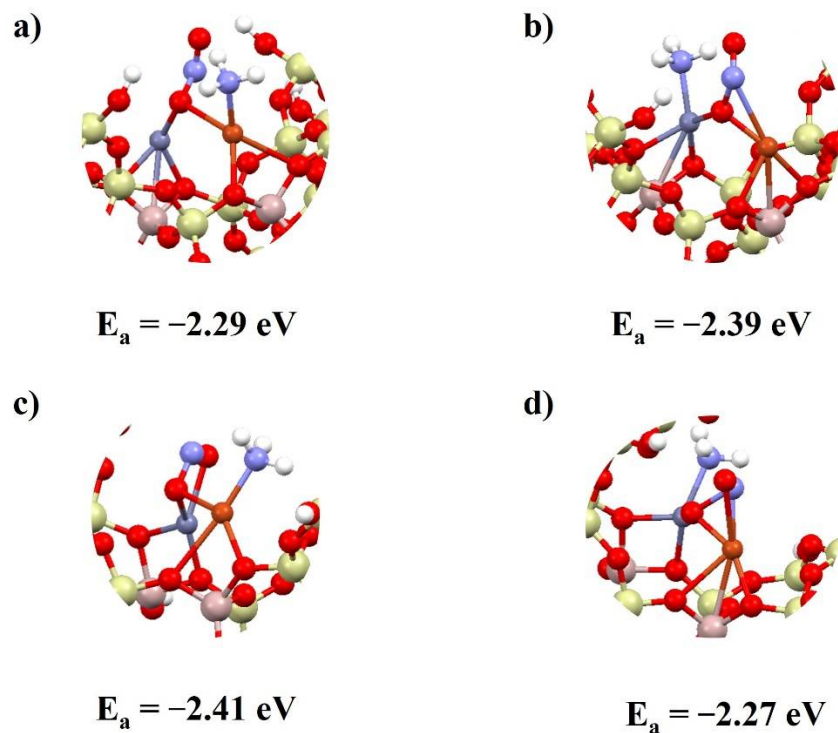

**Figure S3.** Coadsorption of NO and NH<sub>3</sub> on Cu-O-Zn dimer in zeolite FAU: a) NH<sub>3</sub> on Cu in dimer, b) NH<sub>3</sub> on Zn in dimer; and in zeolite MFI: c) NO on Cu in dimer d) NO on oxygen bridge in dimer. Energies of adsorption below structure.

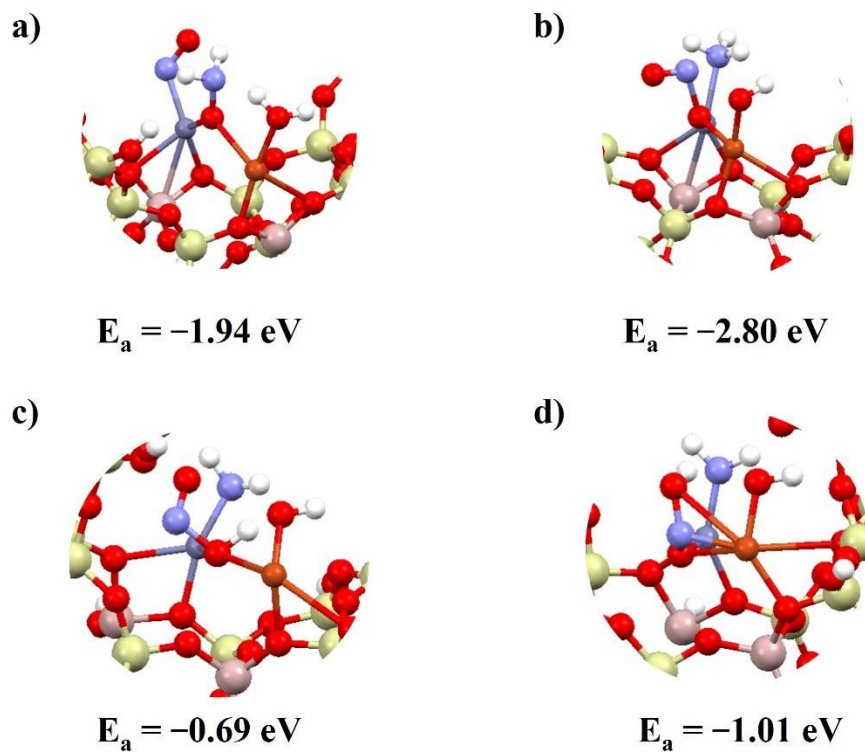

**Figure S4.** Coadsorption of NO and NH<sub>3</sub> on Cu-O-Zn dimer with OH group on Cu in zeolite FAU: a) NH<sub>3</sub> on Cu in dimer, b) NH<sub>3</sub> on Zn in dimer; and in zeolite MFI: c) NO on Cu in dimer d) NO on oxygen bridge in dimer. Energies of adsorption below structure.

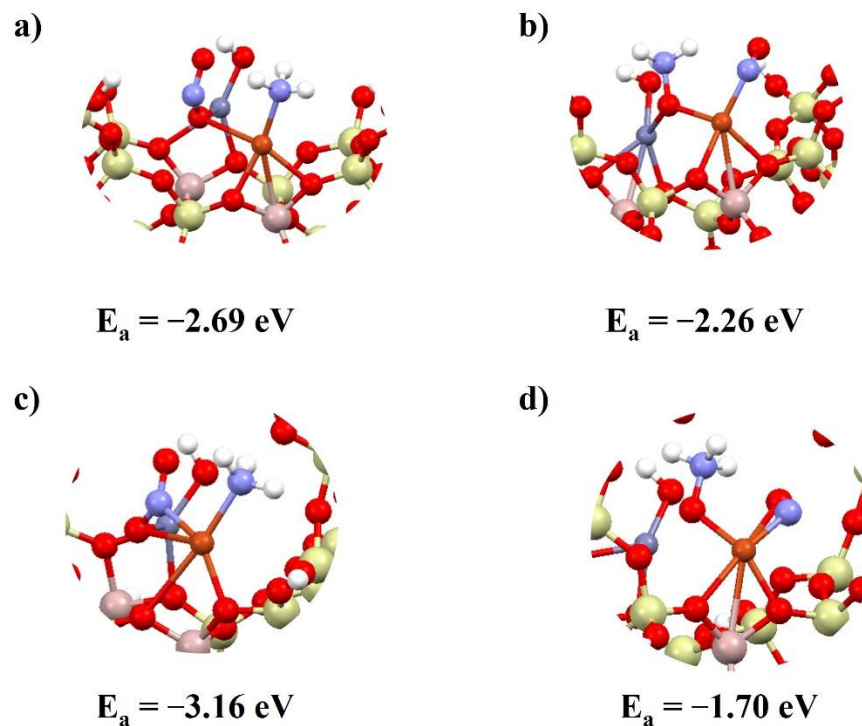

**Figure S5.** Coadsorption of NO and NH<sub>3</sub> on Cu-O-Zn dimer with OH group on Zn in zeolite FAU: a) NH<sub>3</sub> on Cu in dimer, b) NH<sub>3</sub> on Zn in dimer; and in zeolite MFI: c) NO on Cu in dimer d) NO on oxygen bridge in dimer. Energies of adsorption below structure.

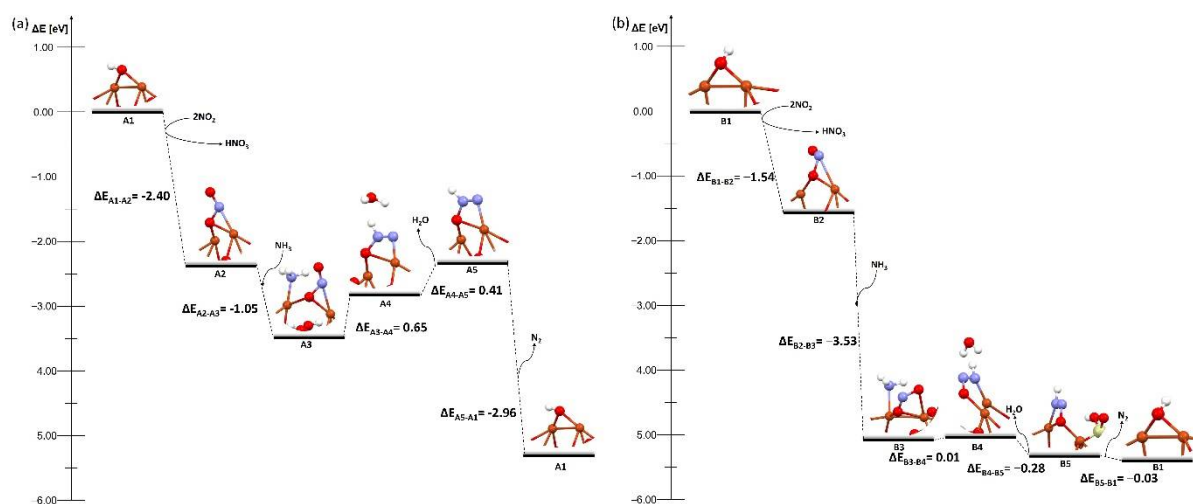

**Figure S6.** Energy diagram of proposed mechanism of deNOx in the Cu-O-Cu dimer supported on a) copper dimer on FAU and b) copper dimer on MFI with bridged OH group on both zeolites.

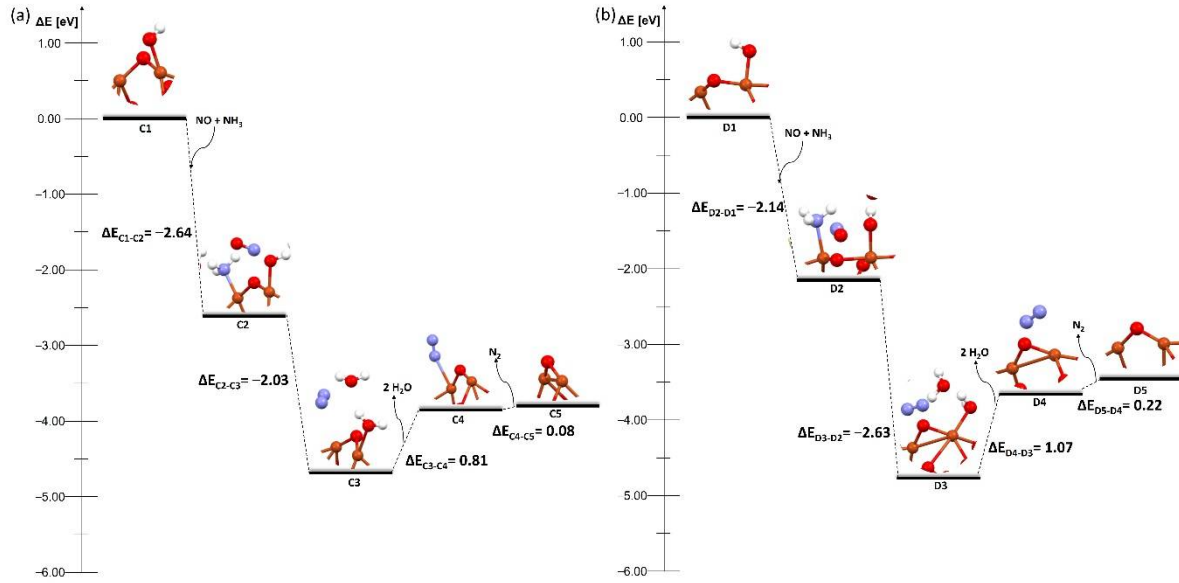

**Figure S7.** Energy diagram of proposed mechanism of deNOx in the Cu-O-Zn dimer supported on a) copper dimer on FAU and b) copper dimer on MFI with OH group on Cu on both zeolites.

**The adsorption energy of individual structures was calculated according to the formula below.**

The adsorption energies of the adsorbates on the cluster were calculated as follows:

$$E_a(\text{adsorbate/cluster}) = E_{\text{tot}}(\text{adsorbate/cluster}) - E_{\text{tot}}(\text{cluster}) - E_{\text{tot}}(\text{adsorbate}),$$

where  $E_{\text{tot}}(\text{adsorbate/cluster})$  is the total energy of the adsorbate/cluster surface complex,  $E_{\text{tot}}(\text{cluster})$  and  $E_{\text{tot}}(\text{adsorbate})$  are the total energies of pure cluster and the adsorbate, respectively.

Energy difference between stages in mechanism with bridged OH group were calculated as follows:

1. Energy difference between stage A2 and A1 (same for B diagram):

$$E_{\text{diff}} = E_{A2} - E_{A1} - 2E_{\text{NO}_2} + E_{\text{HNO}_3} [\text{eV}]$$

2. Energy difference between stage A3 and A2 (same for B diagram):

$$E_{\text{diff}} = E_{A3} - E_{A2} - E_{\text{NH}_3} [\text{eV}]$$

3. Energy difference between stage A4 and A3 (same for B diagram):

$$E_{\text{diff}} = E_{A4} - E_{A3} [\text{eV}]$$

4. Energy difference between stage A5 and A4 (same for B diagram):

$$E_{\text{diff}} = E_{A5} - E_{A4} + E_{\text{H}_2\text{O}} [\text{eV}]$$

5 Energy difference between stage A1 and A5 (same for B diagram):

$$E_{\text{diff}} = E_{A1} - E_{A5} + E_{N2} \text{ [eV]}$$

Energy difference between stages in mechanism with OH group on metal atom were calculated as follows:

1 Energy difference between stage C2 and C1 (same for D, E and F diagrams):

$$E_{\text{diff}} = E_{C2} - E_{C1} - E_{NO} - E_{NH3} \text{ [eV]}$$

2 Energy difference between stage C3 and C2 (same for D, E and F diagrams):

$$E_{\text{diff}} = E_{C3} - E_{C2} \text{ [eV]}$$

3 Energy difference between stage C4 and C3 (same for D, E and F diagrams):

$$E_{\text{diff}} = E_{C4} - E_{C3} + 2E_{H2O} \text{ [eV]}$$

4 Energy difference between stage C5 and C4 (same for D, E and F diagrams):

$$E_{\text{diff}} = E_{C5} - E_{C4} + E_{N2} \text{ [eV]}$$

The lowest energy systems were used for all the calculations.

Table S1 Energies for different structure and considered multiplicities.

(a)

| Structure | Multiplicity | Energy [H] | Structure | Multiplicity | Energy [H] |
|-----------|--------------|------------|-----------|--------------|------------|
| A1        | 1            | -15108.916 | B1        | 1            | -13195.657 |
|           | 3            | -15108.847 |           | 3            | -13195.662 |
|           | 5            | -15108.722 |           | 5            | -13195.535 |
|           | 7            | -15108.499 |           | 7            | -13195.391 |
| A2        | 1            | -15238.233 | B2        | 1            | -13324.968 |
|           | 3            | -15238.201 |           | 3            | -13324.956 |
|           | 5            | -15238.093 |           | 5            | -13324.927 |
|           | 7            | -15237.958 |           | 7            | -13324.833 |
| A3        | 1            | -15294.842 | B3        | 1            | -13381.577 |
|           | 3            | -15294.816 |           | 3            | -13381.578 |
|           | 5            | -15294.691 |           | 5            | -13381.506 |
|           | 7            | -15294.541 |           | 7            | -13381.400 |
| A4        | 1            | -15294.836 | B4        | 1            | -13381.523 |
|           | 3            | -15294.724 |           | 3            | -13381.545 |
|           | 5            | -15294.655 |           | 5            | -13381.445 |
|           | 7            | -15294.577 |           | 7            | -13381.405 |
| A5        | 1            | -15218.389 | B5        | 1            | -13305.087 |
|           | 3            | -15218.346 |           | 3            | -13305.084 |
|           | 5            | -15218.239 |           | 5            | -13305.051 |
|           | 7            | -15218.096 |           | 7            | -13304.932 |

(b)

| Structure | Multiplicity | Energy [H]    | Structure | Multiplicity | Energy [H] |
|-----------|--------------|---------------|-----------|--------------|------------|
| C1        | 1            | -15184.068    | D1        | 1            | -13270.785 |
|           | 3            | -15184.060    |           | 3            | -13270.780 |
|           | 5            | -15183.971    |           | 5            | -13270.761 |
|           | 7            | -15183.816    |           | 7            | -13270.650 |
| C2        | 2            | -15370.652    | D2        | 2            | -13457.303 |
|           | 4            | -15370.596    |           | 4            | -13457.294 |
|           | 6            | -15370.476    |           | 6            | -13457.216 |
|           | 8            | -15370.357    |           | 8            | -13457.033 |
| C3        | 2            | -15370.723    | D3        | 2            | -13457.428 |
|           | 4            | -15370.630    |           | 4            | -13457.432 |
|           | 6            | -15370.456    |           | 6            | -13457.322 |
|           | 8            | not converged |           | 8            | -13457.173 |
| C4        | 2            | -15217.823    | D4        | 2            | -13304.560 |
|           | 4            | -15217.732    |           | 4            | -13304.541 |
|           | 6            | -15217.537    |           | 6            | -13304.396 |
|           | 8            | -15217.415    |           | 8            | -13304.255 |
| C5        | 2            | -15108.273    | D5        | 2            | -13195.008 |
|           | 4            | -15108.190    |           | 4            | -13195.003 |
|           | 6            | -15108.060    |           | 6            | -13194.884 |
|           | 8            | -15107.838    |           | 8            | -13194.712 |

(c)

| Structure | Multiplicity | Energy [H] | Structure | Multiplicity | Energy [H] |
|-----------|--------------|------------|-----------|--------------|------------|
| E1        | 1            | -15184.073 | F1        | 1            | -13270.798 |
|           | 3            | -15184.060 |           | 3            | -13270.800 |
|           | 5            | -15183.956 |           | 5            | -13270.780 |
|           | 7            | -15183.795 |           | 7            | -13270.654 |
| E2        | 2            | -15370.652 | F2        | 2            | -13457.397 |
|           | 4            | -15370.591 |           | 4            | -13457.338 |
|           | 6            | -15370.469 |           | 6            | -13457.289 |
|           | 8            | -15370.293 |           | 8            | -13457.105 |
| E3        | 2            | -15370.649 | F3        | 2            | -13457.444 |
|           | 4            | -15370.551 |           | 4            | -13457.425 |
|           | 6            | -15370.463 |           | 6            | -13457.281 |
|           | 8            | -15370.338 |           | 8            | -13457.142 |
| E4        | 2            | -15217.809 | F4        | 2            | -13304.553 |
|           | 4            | -15217.597 |           | 4            | -13304.530 |
|           | 6            | -15217.454 |           | 6            | -13304.418 |
|           | 8            | -15217.728 |           | 8            | -13304.256 |
| E5        | 2            | -15108.273 | F5        | 2            | -13195.008 |
|           | 4            | -15108.190 |           | 4            | -13195.003 |
|           | 6            | -15108.060 |           | 6            | -13194.884 |
|           | 8            | -15107.838 |           | 8            | -13194.712 |
